# Supplementary material
Source: PubMed Central journal article supplement (PMC6428045)
Supplement: NIHMS1013039-supplement-supplemental_material.pdf [file NIHMS1013039-supplement-supplemental_material.pdf]

## **SUPPLEMENTAL MATERIAL**

**Supplementary Table 1: Steady-State Insulin, Glucose Infusion Rate and M/I**

| Variables                               | Baseline       |               | 3 months      |               |
|-----------------------------------------|----------------|---------------|---------------|---------------|
|                                         | Placebo        | Metformin     | Placebo       | Metformin     |
| <b>Steady-State Insulin (uIU/uL)</b>    | 171.3±62.9     | 192.9±93.6    | 224.9±159.3   | 175.5±71.3    |
| <b>GIR (mg/kg/min)</b>                  | 7.5±3.7        | 7.7±3.7       | 9.0±5.3       | 8.0±3.5       |
| <b>GIR (mg/lean kg/min)</b>             | 11.2±4.9       | 11.8±4.8      | 13.4±6.9      | 12.3±4.9      |
| <b>M/I (mg/kg/min)/uIU/uL</b>           | 3.9 (2.1-8.5)  | 3.5 (2.4-6.3) | 3.6 (2.9-5.2) | 4.5 (3.1-6.0) |
| <b>M/I Lean (mg/lean kg/min)/uIU/uL</b> | 6.2 (3.6-10.9) | 6.0 (3.8-8.7) | 5.7 (4.4-7.6) | 6.8 (5.4-8.7) |

Data are presented as mean ± SD, or median (p25, p75) as appropriate

GIR = glucose infusion rate, M = steady-state glucose infusion rate, I = steady-state insulin

**Supplementary Table 2: The Effects of Metformin on Change in Glycemia, Blood Pressure and Lipids**

| Variables         | Metformin        | Placebo          | Metformin vs. Placebo |
|-------------------|------------------|------------------|-----------------------|
|                   | LSM±SE           | LSM±SE           | P-value               |
| ΔHbA1c (mmol/mol) | -0.01±0.22       | 0.02±0.23        | 0.91                  |
| ΔSBP (mm Hg)      | -0.7±1.7         | -1.7±1.8         | 0.69                  |
| ΔDBP (mm Hg)      | -2.2±1.4         | -0.2±1.5         | 0.33                  |
| ΔTotal-C (mmol/L) | -0.1036±0.09842  | 0.06475±0.10878  | 0.26                  |
| ΔLDL-C (mmol/L)   | -0.27972±0.13986 | -0.17612±0.14763 | 0.62                  |
| ΔHDL-C (mmol/L)   | 0.01036±0.03885  | 0.00259±0.04144  | 0.88                  |
| ΔTG (mmol/L)      | 0.06±0.07        | 0.092±0.063      | 0.74                  |

**Delta (Δ) value = 3-month value – baseline value.**

Results are adjusted for baseline values

SBP = systolic blood pressure, DBP = diastolic blood pressure, Total-C = total cholesterol, LDL-C = low-density lipoprotein cholesterol, HDL-C = high-density lipoprotein cholesterol, TG = triglycerides

Data are presented as least square means (LSM) and standard errors (SE) from generalized linear regression models
